# Supplementary material
Source: PubMed Central journal article supplement (PMC7666418)

# WEB MATERIAL

## Cardiotoxicity of Use of Sequential Aromatase Inhibitors in Women With Breast Cancer

Farzin Khosrow-Khavar, Nathaniel Bouganim, Kristian B. Fillion, Samy Suissa, Laurent Azoulay

### Contents

|                   |    |
|-------------------|----|
| Web Table 1.....  | 2  |
| Web Table 2.....  | 3  |
| Web Table 3.....  | 4  |
| Web Table 4.....  | 6  |
| Web Table 5.....  | 7  |
| Web Table 6.....  | 8  |
| Web Table 7.....  | 9  |
| Web Table 8.....  | 10 |
| Web Table 9.....  | 11 |
| Web Table 10..... | 12 |
| Web Figure 1..... | 13 |
| Web Figure 2..... | 14 |
| Web Figure 3..... | 15 |
| Web Figure 4..... | 16 |
| Web Figure 5..... | 17 |

**Web Table 1.** ICD-9 and ICD-10 Diagnostic Codes for Cardiovascular Outcomes

| <b>Study Outcome</b>     | <b>ICD-9 Diagnosis Codes</b>                                                          | <b>ICD-10 Diagnosis Codes</b> |
|--------------------------|---------------------------------------------------------------------------------------|-------------------------------|
| Myocardial infarction    | 410x                                                                                  | I21x                          |
| Ischemic stroke          | 433x, 434x, 436x                                                                      | I63x, I64x                    |
| Congestive heart failure | 428x                                                                                  | I50x                          |
| Cardiovascular mortality | 390x-398x, 401x-405x, 410x-417x, 420x-429x<br>(excluding 427.5), 430x-438x, 440x-447x | I00x-I77x excluding I46.9     |

*ICD-9, International Classification of Diseases, Ninth Revision; ICD-10, International Classification of Diseases, Tenth Revision.*

**Web Table 2.** Cohort Entry Year of Patients Who Switch to Aromatase Inhibitors and those Who Continue on Tamoxifen, United Kingdom, 1998–2016

| <b>Year of Cohort Entry</b> | <b>Aromatase Inhibitors (<i>n</i> = 1,962)</b> |          | <b>Tamoxifen (<i>n</i> = 3,874)</b> |          |
|-----------------------------|------------------------------------------------|----------|-------------------------------------|----------|
|                             | <b>No.</b>                                     | <b>%</b> | <b>No.</b>                          | <b>%</b> |
| 1998–2002                   | 167                                            | 8.5      | 693                                 | 17.9     |
| 2003–2007                   | 963                                            | 49.1     | 1,665                               | 43.0     |
| 2008–2012                   | 677                                            | 34.5     | 1,098                               | 28.3     |
| 2013–2016                   | 155                                            | 7.9      | 418                                 | 10.8     |

**Web Table 3.** Baseline Characteristics of Women Diagnosed with Breast Cancer and Stratified by Treatment (Switch with Aromatase Inhibitors or Continuous Tamoxifen) Before Matching on Propensity Scores, United Kingdom, 1998–2016

| Characteristic                      | AIs<br>( <i>n</i> = 2,145) |              | Tamoxifen<br>( <i>n</i> = 150,673) |      | SD   |
|-------------------------------------|----------------------------|--------------|------------------------------------|------|------|
|                                     | No.                        | %            | No.                                | %    |      |
| Age, years <sup>a</sup>             | 68.2 (10.7)                |              | 68.5 (11.1)                        |      | 0.03 |
| Body mass index <sup>b</sup>        |                            |              |                                    |      |      |
| ≤ 24.9                              | 795                        | 37.1         | 55,648                             | 36.9 | 0.00 |
| 25.0-29.9                           | 707                        | 33.0         | 47,264                             | 31.4 | 0.03 |
| ≥30.0                               | 474                        | 22.1         | 34,456                             | 22.9 | 0.02 |
| Unknown                             | 169                        | 7.9          | 13,305                             | 8.8  | 0.03 |
| Townsend deprivation score          |                            |              |                                    |      |      |
| Quintile 1                          | 569                        | 26.5         | 38,877                             | 25.8 | 0.02 |
| Quintile 2                          | 598                        | 27.9         | 40,516                             | 26.9 | 0.02 |
| Quintile 3                          | 446                        | 20.8         | 33,354                             | 22.1 | 0.03 |
| Quintile 4                          | 365                        | 17.0         | 25,541                             | 17.0 | 0.00 |
| Quintile 5                          | 167                        | 7.8          | 12,358                             | 8.2  | 0.02 |
| Unknown                             | 0                          | 0.0          | 27                                 | 0.0  | 0.02 |
| Ethnicity                           |                            |              |                                    |      |      |
| Caucasian                           | 2,040                      | 95.1         | 142,506                            | 94.6 | 0.02 |
| Other                               | 47                         | 2.2          | 2,758                              | 1.8  | 0.03 |
| Unknown                             | 58                         | 2.7          | 5,409                              | 3.6  | 0.05 |
| Smoking status                      |                            |              |                                    |      |      |
| Current                             | 312                        | 14.6         | 20,863                             | 13.9 | 0.02 |
| Past                                | 537                        | 25.0         | 33,679                             | 22.4 | 0.06 |
| Never                               | 1,224                      | 57.1         | 88,367                             | 58.7 | 0.03 |
| Unknown                             | 72                         | 3.4          | 7,764                              | 5.2  | 0.09 |
| Comorbidities                       |                            |              |                                    |      |      |
| Alcohol-related disorders           | 124                        | 5.8          | 8,668                              | 5.8  | 0.00 |
| Myocardial infarction               | 42                         | 2.0          | 2,652                              | 1.8  | 0.01 |
| Stroke or transient ischemic attack | 77                         | 3.6          | 4,865                              | 3.2  | 0.02 |
| Heart failure                       | 74                         | 3.4          | 4,367                              | 2.9  | 0.03 |
| Peripheral vascular disease         | 50                         | 2.3          | 2,787                              | 1.9  | 0.03 |
| Venous thromboembolism              | 208                        | 9.7          | 9,928                              | 6.6  | 0.11 |
| COPD                                | 104                        | 4.8          | 6,632                              | 4.4  | 0.02 |
| Chronic kidney disease              | 140                        | 6.5          | 10,319                             | 6.9  | 0.01 |
| Other cancers                       | 574                        | 26.8         | 31,291                             | 20.8 | 0.14 |
| Non-breast cancer surgery           | 530                        | 24.7         | 34,286                             | 22.8 | 0.05 |
| Anticoagulants                      |                            |              |                                    |      |      |
| Vitamin K antagonists               | 98                         | 4.6          | 3,557                              | 2.4  | 0.12 |
| Direct oral anticoagulants          | <sup>c</sup>               | <sup>c</sup> | 14                                 | 0.0  | 0.02 |
| Heparin                             | 21                         | 1.0          | 544                                | 0.4  | 0.08 |

| Characteristic                                          | AIs<br>(n = 2,145) |      | Tamoxifen<br>(n = 150,673) |      | SD   |
|---------------------------------------------------------|--------------------|------|----------------------------|------|------|
|                                                         | No.                | %    | No.                        | %    |      |
| <b>Antidepressants</b>                                  |                    |      |                            |      |      |
| SSRIs                                                   | 228                | 10.6 | 14,598                     | 9.7  | 0.03 |
| SNRIs                                                   | 52                 | 2.4  | 2,199                      | 1.5  | 0.07 |
| Tricyclic antidepressants                               | 247                | 11.5 | 14,568                     | 9.7  | 0.06 |
| Other                                                   | 23                 | 1.1  | 1,535                      | 1.0  | 0.01 |
| <b>Antidiabetic drugs</b>                               |                    |      |                            |      |      |
| Metformin                                               | 104                | 4.8  | 7,102                      | 4.7  | 0.01 |
| Sulfonylureas                                           | 60                 | 2.8  | 4,281                      | 2.8  | 0.00 |
| Thiazolidinediones                                      | 18                 | 0.8  | 808                        | 0.5  | 0.04 |
| Incretin-based drugs                                    | c                  | c    | 418                        | 0.3  | 0.04 |
| Insulin                                                 | 26                 | 1.2  | 1,861                      | 1.2  | 0.00 |
| Other                                                   | c                  | c    | 93                         | 0.1  | 0.01 |
| <b>Antihypertensive drugs</b>                           |                    |      |                            |      |      |
| Diuretics                                               | 600                | 28.0 | 44,380                     | 29.5 | 0.03 |
| Beta-blockers                                           | 409                | 19.1 | 27,963                     | 18.6 | 0.01 |
| Calcium channel blockers                                | 348                | 16.2 | 23,758                     | 15.8 | 0.01 |
| ACE inhibitors                                          | 343                | 16.0 | 24,035                     | 16.0 | 0.00 |
| Angiotensin II receptor blockers                        | 156                | 7.3  | 10,800                     | 7.2  | 0.00 |
| Other                                                   | 129                | 6.0  | 7,452                      | 5.0  | 0.05 |
| <b>Other drugs</b>                                      |                    |      |                            |      |      |
| Bisphosphonates                                         | 106                | 4.9  | 7,670                      | 5.1  | 0.01 |
| NSAIDs                                                  | 365                | 17.0 | 24,156                     | 16.0 | 0.03 |
| Opioids                                                 | 599                | 27.9 | 37,909                     | 25.2 | 0.06 |
| Acetylsalicylic acid                                    | 344                | 16.0 | 22,933                     | 15.2 | 0.02 |
| Non-ASA antiplatelets                                   | 36                 | 1.7  | 2,272                      | 1.5  | 0.01 |
| Statins                                                 | 396                | 18.5 | 25,651                     | 17.0 | 0.04 |
| Hormone replacement therapy                             | 120                | 5.6  | 6,979                      | 4.6  | 0.04 |
| <b>Breast-cancer related variables</b>                  |                    |      |                            |      |      |
| Chemotherapy                                            | 330                | 15.4 | 16,390                     | 10.9 | 0.13 |
| Radiation therapy                                       | 414                | 19.3 | 28,561                     | 19.0 | 0.01 |
| Breast cancer surgery                                   | 1,777              | 82.8 | 131,641                    | 87.4 | 0.13 |
| Time since diagnosis, months <sup>a</sup>               | 22.2 (16.2)        |      | 22.5 (17.3)                |      | 0.02 |
| Duration of previous tamoxifen use, months <sup>a</sup> | 19.0 (15.6)        |      | 19.7 (16.9)                |      | 0.04 |

Abbreviations: ACE, angiotensin converting enzyme; AIs, aromatase inhibitors; ASA, acetylsalicylic acid; COPD, chronic obstructive pulmonary disease; NSAIDs, non-steroidal anti-inflammatory drugs; SD, standardized difference; SNRIs, serotonin and noradrenaline reuptake inhibitors; SSRIs, selective serotonin reuptake inhibitors

a. Values are expressed as mean (standard deviation)

b. Weight (kg)/height (m<sup>2</sup>)

c. Cells with less than five observations are not displayed, as per the confidentiality policies of the Clinical Practice Research Datalink

**Web Table 4.** Number of Patients at Risk Since Time from Treatment Initiation Stratified by Cardiovascular Outcome and Treatment

| Outcome                  | Treatment            | Patients at Risk |        |        |        |        |        |
|--------------------------|----------------------|------------------|--------|--------|--------|--------|--------|
|                          |                      | Baseline         | Year 1 | Year 2 | Year 3 | Year 4 | Year 5 |
| Myocardial infarction    | Aromatase inhibitors | 1,962            | 1,189  | 822    | 516    | 261    | 98     |
|                          | Tamoxifen            | 3,874            | 2,447  | 1,503  | 808    | 396    | 84     |
| Ischemic stroke          | Aromatase inhibitors | 1,962            | 1,188  | 824    | 517    | 264    | 99     |
|                          | Tamoxifen            | 3,874            | 2,447  | 1,501  | 807    | 395    | 83     |
| Heart failure            | Aromatase inhibitors | 1,962            | 1,191  | 824    | 517    | 264    | 98     |
|                          | Tamoxifen            | 3,874            | 2,446  | 1,503  | 810    | 396    | 84     |
| Cardiovascular mortality | Aromatase inhibitors | 1,962            | 1,191  | 825    | 519    | 264    | 99     |
|                          | Tamoxifen            | 3,874            | 2,447  | 1,501  | 807    | 395    | 83     |

**Web Table 5.** Risk of Major Adverse Cardiovascular Events (MACE)<sup>a</sup> When Comparing Aromatase Inhibitors Switchers Versus Continuing Tamoxifen in Women with Breast Cancer, United Kingdom, 1998–2016

| Exposure             | No. of Events | Person-Years | Incidence Rate <sup>b</sup> |           | HR <sup>c</sup> |            |
|----------------------|---------------|--------------|-----------------------------|-----------|-----------------|------------|
|                      |               |              | IR                          | 95% CI    | HR              | 95% CI     |
| Tamoxifen            | 55            | 7,114        | 7.7                         | 5.8, 10.1 | 1.00            | Referent   |
| Aromatase inhibitors | 46            | 3,809        | 12.1                        | 8.8, 16.1 | 1.47            | 0.98, 2.18 |

a. MACE includes nonfatal myocardial infarction, nonfatal stroke, and cardiovascular mortality.

b. Per 1,000 person-years.

c. Hazard ratio obtained from matched population.

**Web Table 6.** Risk of Myocardial Infarction, Ischemic Stroke, Heart Failure, and Cardiovascular Mortality When Comparing Aromatase Inhibitors Switchers versus Continuing Tamoxifen in Women with Breast Cancer When Stratifying by Duration of Previous Tamoxifen Use, United Kingdom, 1998–2016

| Outcome                  | Duration of Previous Tamoxifen Use | Exposure             | No. of Events | Person-Years | Incidence Rate <sup>a</sup> |           | HR <sup>b</sup> |            |
|--------------------------|------------------------------------|----------------------|---------------|--------------|-----------------------------|-----------|-----------------|------------|
|                          |                                    |                      |               |              | IR                          | 95% CI    | HR              | 95% CI     |
| Myocardial infarction    | ≤1year                             | Tamoxifen            | 9             | 3,613        | 2.5                         | 1.1, 4.7  | 1.00            | Referent   |
|                          |                                    | Aromatase inhibitors | 11            | 1,876        | 5.9                         | 2.9, 10.5 | 2.00            | 0.81, 4.93 |
|                          | >1year                             | Tamoxifen            | 5             | 3,513        | 1.4                         | 0.5, 3.3  | 1.00            | Referent   |
|                          |                                    | Aromatase inhibitors | 7             | 1,944        | 3.6                         | 1.5, 7.4  | 2.29            | 0.72, 7.27 |
| Ischemic stroke          | ≤1year                             | Tamoxifen            | 13            | 3,614        | 3.6                         | 1.9, 6.2  | 1.00            | Referent   |
|                          |                                    | Aromatase inhibitors | 11            | 1,874        | 5.9                         | 2.9, 10.5 | 1.46            | 0.65, 3.29 |
|                          | >1year                             | Tamoxifen            | 9             | 3,507        | 2.6                         | 1.2, 4.9  | 1.00            | Referent   |
|                          |                                    | Aromatase inhibitors | 8             | 1,957        | 4.1                         | 1.8, 8.1  | 1.45            | 0.56, 3.77 |
| Heart failure            | ≤1year                             | Tamoxifen            | 5             | 3,616        | 1.4                         | 0.5, 3.2  | 1.00            | Referent   |
|                          |                                    | Aromatase inhibitors | 9             | 1,878        | 4.8                         | 2.2, 9.1  | 3.16            | 1.05, 9.51 |
|                          | >1year                             | Tamoxifen            | 9             | 3,512        | 2.6                         | 1.2, 4.9  | 1.00            | Referent   |
|                          |                                    | Aromatase inhibitors | <sup>c</sup>  | <sup>c</sup> | 2.0                         | 0.6, 5.2  | 0.73            | 0.22, 2.38 |
| Cardiovascular mortality | ≤1year                             | Tamoxifen            | 22            | 3,619        | 6.1                         | 3.8, 9.2  | 1.00            | Referent   |
|                          |                                    | Aromatase Inhibitors | 11            | 1,882        | 5.8                         | 2.9, 10.5 | 0.83            | 0.40, 1.76 |
|                          | >1year                             | Tamoxifen            | 14            | 3,515        | 4.0                         | 2.2, 6.7  | 1.00            | Referent   |
|                          |                                    | Aromatase inhibitors | 8             | 1,961        | 4.1                         | 1.8, 8.1  | 0.96            | 0.40, 2.29 |

a. Per 1,000 person-years

b. Hazard ratio obtained from matched population

c. Cells with less than five observations are not displayed, as per the confidentiality policies of the Clinical Practice Research Datalink



**Web Table 7.** Risk of Myocardial Infarction, Ischemic Stroke, Heart Failure, and Cardiovascular Mortality When Comparing Aromatase Inhibitors Switchers versus Continuing Tamoxifen in Women with Breast Cancer Using Inverse Probability of Censoring Weighting for Discontinuation, Switch, and Mortality, United Kingdom, 1998–2016

| Outcome                  | No. of Events | Person-Years | Incidence Rate <sup>a</sup> |          | HR <sup>b</sup> |            |
|--------------------------|---------------|--------------|-----------------------------|----------|-----------------|------------|
|                          |               |              | IR                          | 95% CI   | HR              | 95% CI     |
| Myocardial infarction    |               |              |                             |          |                 |            |
| Tamoxifen                | 14            | 7,126        | 2.0                         | 1.1, 3.3 | 1.00            | Referent   |
| Aromatase inhibitors     | 18            | 3,820        | 4.7                         | 2.8, 7.5 | 1.95            | 0.91, 4.17 |
| Ischemic stroke          |               |              |                             |          |                 |            |
| Tamoxifen                | 22            | 7,120        | 3.1                         | 1.9, 4.7 | 1.00            | Referent   |
| Aromatase inhibitors     | 19            | 3,831        | 5.0                         | 3.0, 7.7 | 1.82            | 0.94, 3.52 |
| Heart failure            |               |              |                             |          |                 |            |
| Tamoxifen                | 14            | 7,128        | 2.0                         | 1.1, 3.3 | 1.00            | Referent   |
| Aromatase inhibitors     | 13            | 3,835        | 3.4                         | 1.8, 5.8 | 1.77            | 0.77, 4.07 |
| Cardiovascular mortality |               |              |                             |          |                 |            |
| Tamoxifen                | 36            | 7,134        | 5.0                         | 3.5, 7.0 | 1.00            | Referent   |
| Aromatase Inhibitors     | 19            | 3,843        | 4.9                         | 3.0, 7.7 | 0.98            | 0.52, 1.84 |

Abbreviation: CI, confidence interval; HR, Hazard ratio

a. Per 1,000 person-years

b. Hazard ratio obtained from matched population

**Web Table 8.** Risk of Myocardial Infarction, Ischemic Stroke, Heart Failure, and Cardiovascular Mortality When Comparing Aromatase Inhibitors Switchers Versus Continuing Tamoxifen in Women with Breast Cancer Using 60-day Grace Period, United Kingdom, 1998–2016

| Outcome                  | No. of Events | Person-Years | Incidence Rate <sup>a</sup> |          | HR <sup>b</sup> |            |
|--------------------------|---------------|--------------|-----------------------------|----------|-----------------|------------|
|                          |               |              | IR                          | 95% CI   | HR              | 95% CI     |
| Myocardial infarction    |               |              |                             |          |                 |            |
| Tamoxifen                | 32            | 15,091       | 2.1                         | 1.5, 3.0 | 1.00            | Referent   |
| Aromatase inhibitors     | 26            | 7,742        | 3.4                         | 2.2, 4.9 | 1.59            | 0.95, 2.68 |
| Ischemic stroke          |               |              |                             |          |                 |            |
| Tamoxifen                | 56            | 15,075       | 3.7                         | 2.8, 4.8 | 1.00            | Referent   |
| Aromatase inhibitors     | 30            | 7,748        | 3.9                         | 2.6, 5.5 | 1.07            | 0.68, 1.66 |
| Heart failure            |               |              |                             |          |                 |            |
| Tamoxifen                | 39            | 15,069       | 2.6                         | 1.8, 3.5 | 1.00            | Referent   |
| Aromatase inhibitors     | 31            | 7,766        | 4.0                         | 2.7, 5.7 | 1.54            | 0.96, 2.48 |
| Cardiovascular mortality |               |              |                             |          |                 |            |
| Tamoxifen                | 90            | 15,144       | 5.9                         | 4.8, 7.3 | 1.00            | Referent   |
| Aromatase Inhibitors     | 35            | 7,791        | 4.5                         | 3.1, 6.3 | 0.77            | 0.52, 1.13 |

Abbreviation: CI, confidence interval; HR, Hazard ratio

a. Per 1,000 person-years

b. Hazard ratio obtained from matched population

**Web Table 9.** Risk of Myocardial Infarction, Ischemic Stroke, Heart Failure, and Cardiovascular Mortality When Comparing Aromatase Inhibitors Switchers Versus Continuing Tamoxifen in Women with Breast Cancer Using 90-day Exposure Lag, United Kingdom, 1998–2016

| Outcome                  | No. of Events | Person-Years | Incidence Rate <sup>a</sup> |          | HR <sup>b</sup> |            |
|--------------------------|---------------|--------------|-----------------------------|----------|-----------------|------------|
|                          |               |              | IR                          | 95% CI   | HR              | 95% CI     |
| Myocardial infarction    | 12            | 6,199        | 1.9                         | 0.8, 3.0 | 1.00            | Referent   |
| Tamoxifen                | 17            | 3,371        | 5.0                         | 2.6, 7.4 | 2.24            | 1.05, 4.80 |
| Aromatase inhibitors     |               |              |                             |          |                 |            |
| Ischemic stroke          | 20            | 6,195        | 3.2                         | 1.8, 4.6 | 1.00            | Referent   |
| Tamoxifen                | 15            | 3,388        | 4.4                         | 2.2, 6.7 | 1.34            | 0.68, 2.63 |
| Aromatase inhibitors     |               |              |                             |          |                 |            |
| Heart failure            | 14            | 6,198        | 2.3                         | 1.1, 3.4 | 1.00            | Referent   |
| Tamoxifen                | 11            | 3,387        | 3.2                         | 1.3, 5.2 | 1.41            | 0.63, 3.13 |
| Aromatase inhibitors     |               |              |                             |          |                 |            |
| Cardiovascular mortality |               |              |                             |          |                 |            |
| Tamoxifen                | 33            | 6,203        | 5.3                         | 3.5, 7.1 | 1.00            | Referent   |
| Aromatase Inhibitors     | 16            | 3,394        | 4.7                         | 2.4, 7.0 | 0.78            | 0.41, 1.43 |

a. Per 1,000 person-years

b. Hazard ratio obtained from matched population

c. Patients who were lost to follow-up, discontinued or switched treatment, or died before end of lag period were censored (AI=1,653, tam=3,527)

**Web Table 10.** Risk of Myocardial Infarction, Ischemic Stroke, Heart Failure, and Cardiovascular Mortality When Comparing Aromatase Inhibitors Switchers versus Continuing Tamoxifen in Women with Breast Cancer When Adjusting for Calendar Time in Outcome Model, United Kingdom, 1998–2016

| Outcome                  | No. of Events | Person-Years | Incidence Rate <sup>a</sup> |          | HR <sup>b</sup> |            |
|--------------------------|---------------|--------------|-----------------------------|----------|-----------------|------------|
|                          |               |              | IR                          | 95% CI   | HR              | 95% CI     |
| Myocardial infarction    |               |              |                             |          |                 |            |
| Tamoxifen                | 14            | 7,126        | 2.0                         | 1.1, 3.3 | 1.00            | Referent   |
| Aromatase inhibitors     | 18            | 3,820        | 4.7                         | 2.8, 7.5 | 2.03            | 0.99, 4.17 |
| Ischemic stroke          |               |              |                             |          |                 |            |
| Tamoxifen                | 22            | 7,120        | 3.1                         | 1.9, 4.7 | 1.00            | Referent   |
| Aromatase inhibitors     | 19            | 3,831        | 5.0                         | 3.0, 7.7 | 1.67            | 0.89, 3.11 |
| Heart failure            |               |              |                             |          |                 |            |
| Tamoxifen                | 14            | 7,128        | 2.0                         | 1.1, 3.3 | 1.00            | Referent   |
| Aromatase inhibitors     | 13            | 3,835        | 3.4                         | 1.8, 5.8 | 1.80            | 0.83, 3.89 |
| Cardiovascular mortality |               |              |                             |          |                 |            |
| Tamoxifen                | 36            | 7,134        | 5.0                         | 3.5, 7.0 | 1.00            | Referent   |
| Aromatase Inhibitors     | 19            | 3,843        | 4.9                         | 3.0, 7.7 | 0.86            | 0.49, 1.54 |

a. Per 1,000 person-years

b. Hazard ratio obtained from matched population

**Web Figure 1.** Flow Diagram of Study Population Depicting Selection of Women with Diagnosis of Breast Cancer Initiating Treatment on Tamoxifen, United Kingdom, 1998–2016

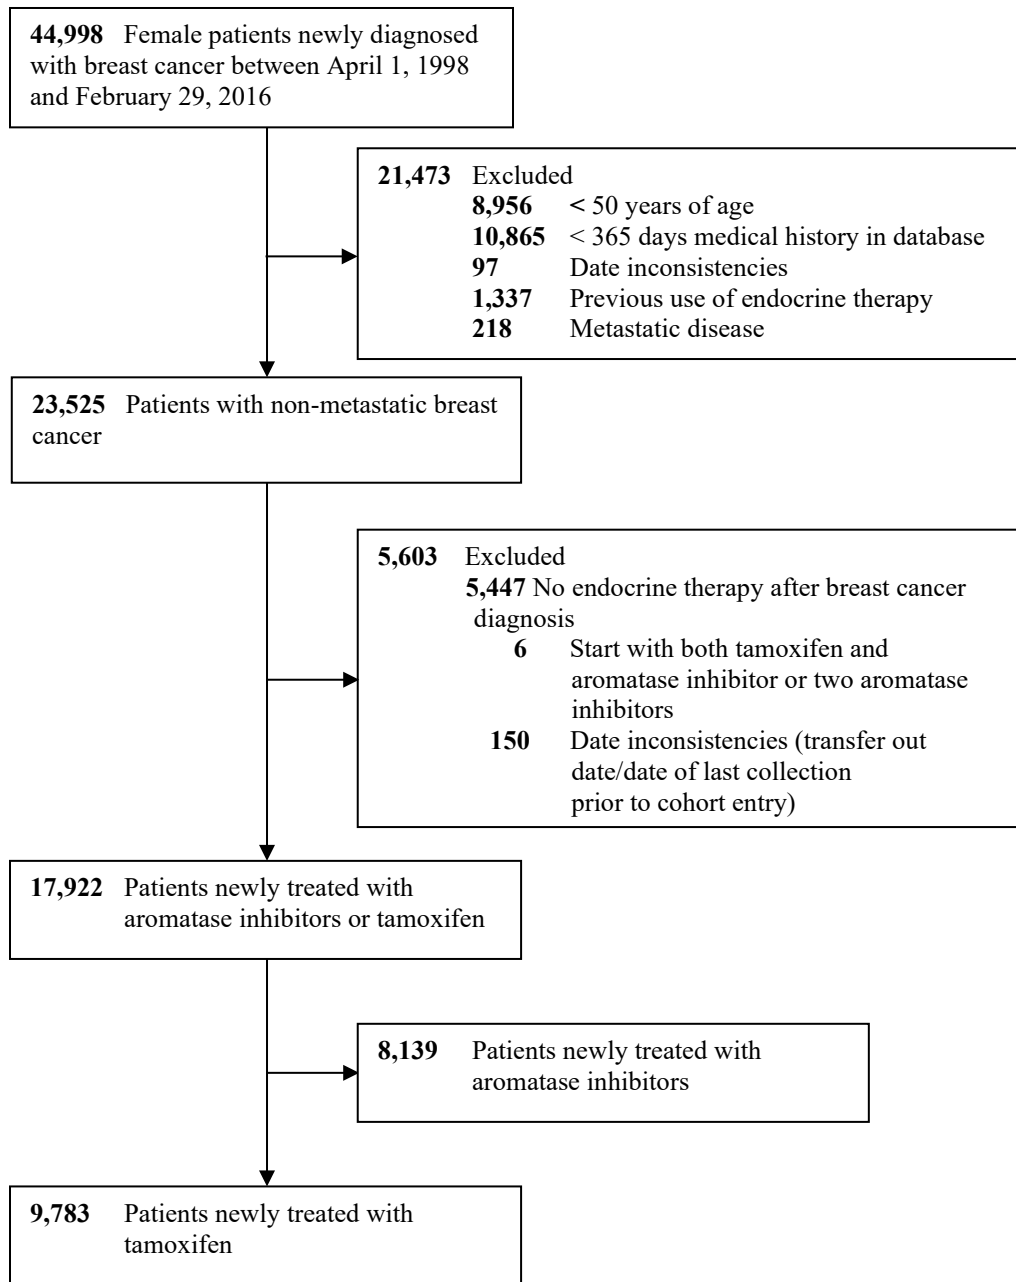

**Web Figure 2.** Flow Diagram Depicting Selection of Patients Switching to Aromatase Inhibitors Who Were Matched with Patients Who Continued Tamoxifen Treatment, United Kingdom, 1998–2016

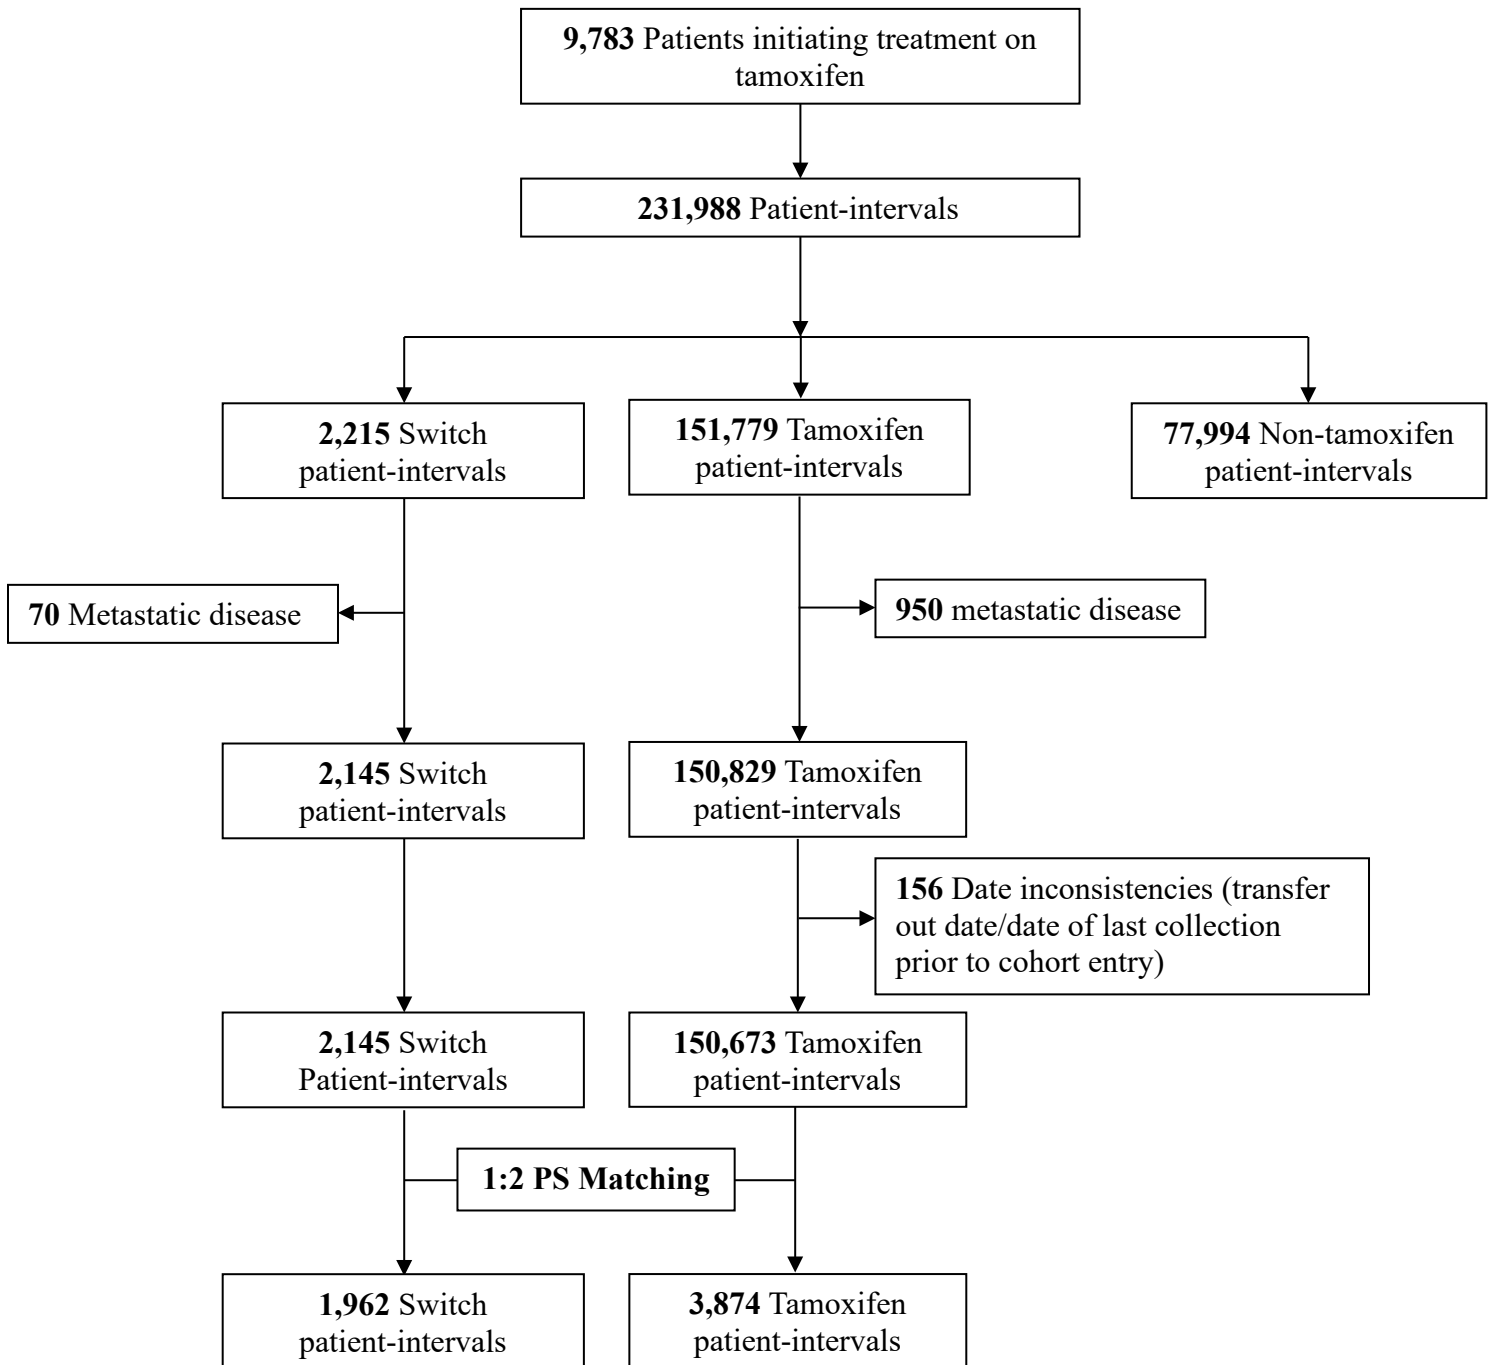

**Web Figure 3.** Schematic of Prevalent New-User Design Depicting Matching of Patients Switching to Aromatase Inhibitors with Patients Continuing Tamoxifen Treatment

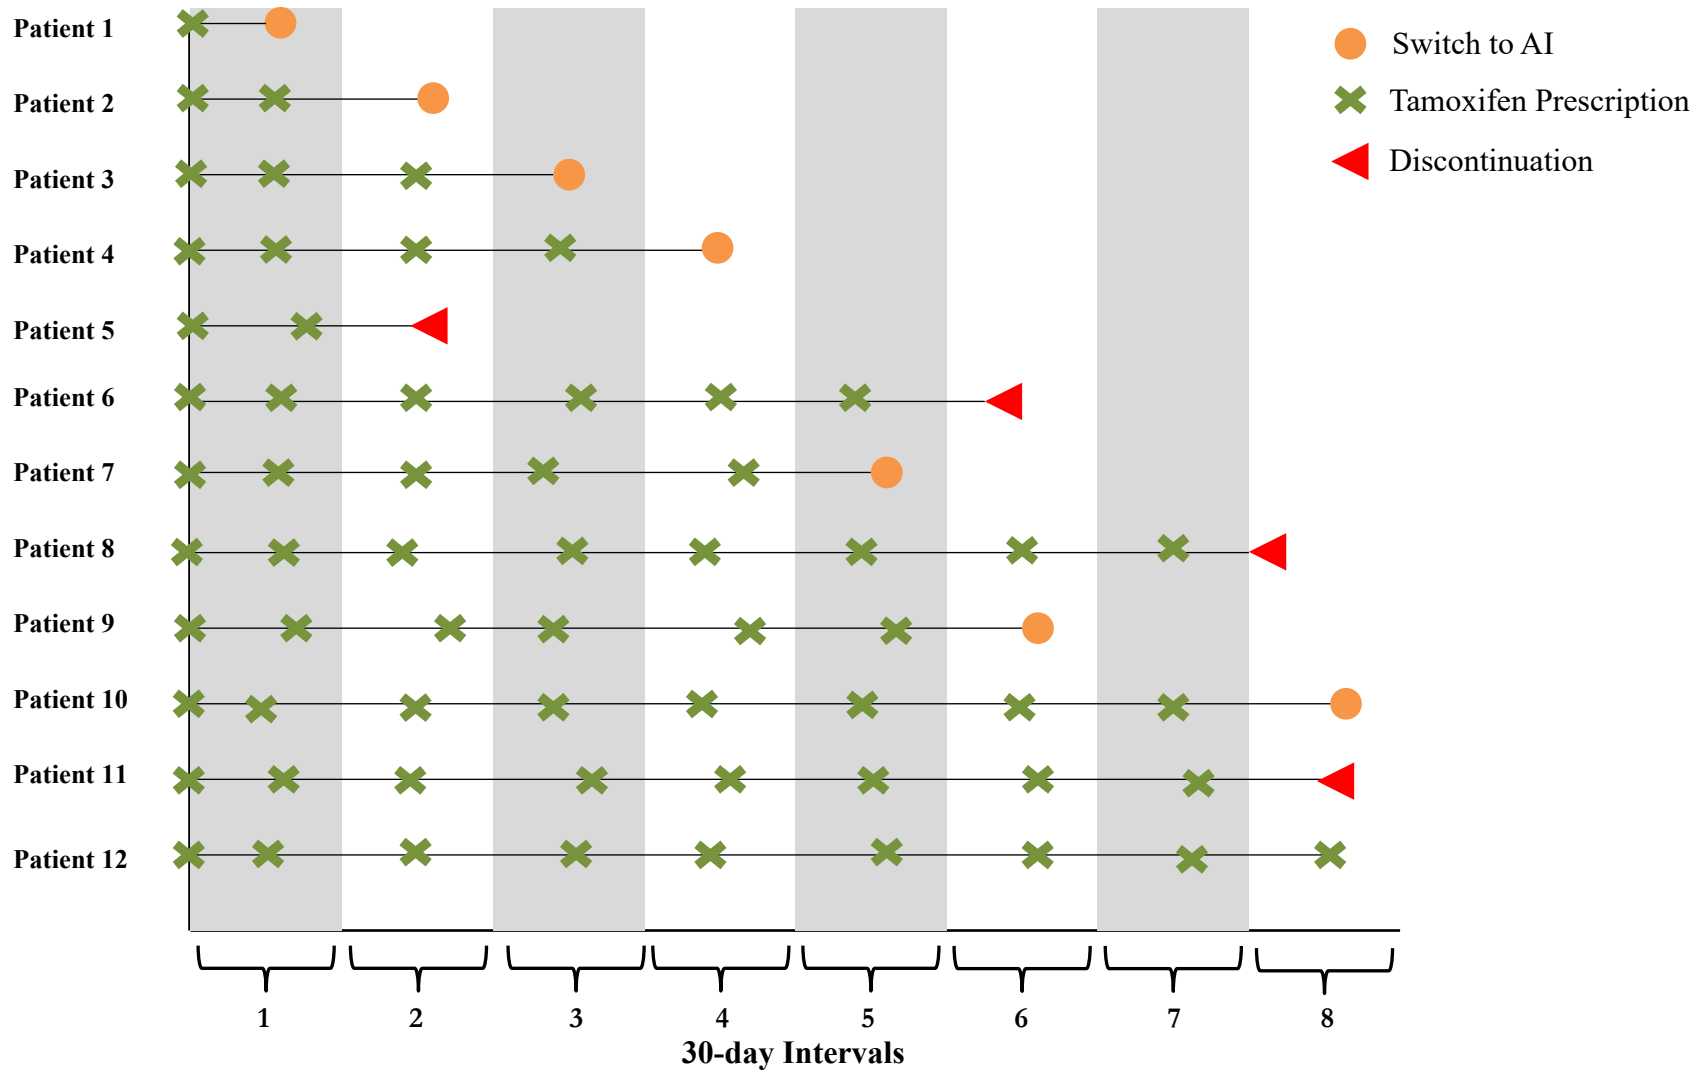

At each 30-day interval, patients who switched to aromatase inhibitors (AIs) were identified (exposed group). In each interval, a patient who switched to AIs was matched to two distinct patients who continued on tamoxifen therapy and received a tamoxifen prescription in the interval. Patients in a given interval were matched based on time-conditional propensity scores using nearest neighbor matching without replacement with a caliper of 0.2 standard deviation of the logit of the propensity score.

**Web Figure 4.** Restricted Cubic Spline of the Hazard Ratio for Myocardial Infarction (Panel A), Ischemic Stroke (Panel B), Heart Failure (Panel C), and Cardiovascular Mortality (Panel D) as a Function of Time on Treatment When Comparing Patients Switching to Aromatase Inhibitors with Patients Continuing Tamoxifen Treatment, United Kingdom, 1998–2016

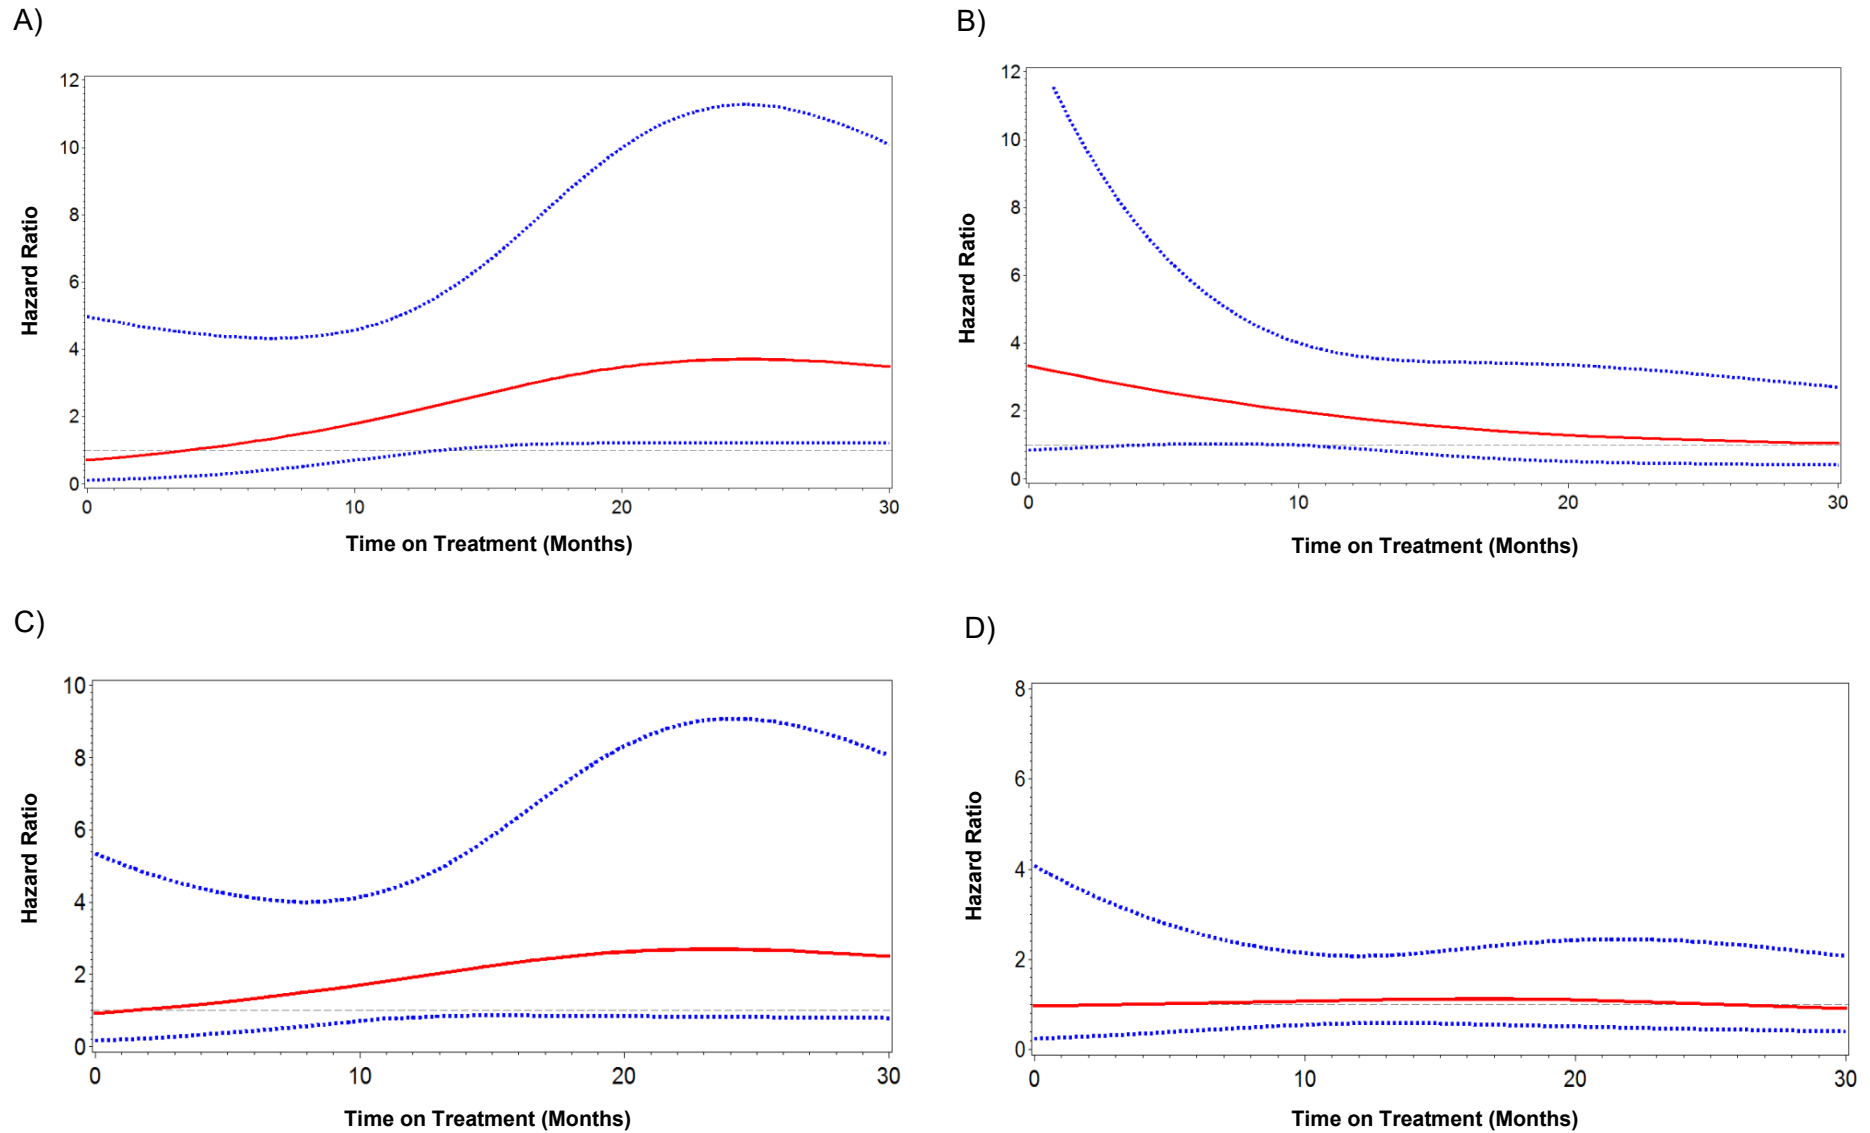



**Web Figure 5.** Restricted Cubic Spline of the Hazard Ratio for Major Adverse Cardiovascular Events (MACE) as a Function of Time on Treatment (Panel A) and Duration of Previous Tamoxifen Treatment (Panel B) When Comparing Patients Switching to Aromatase Inhibitors with Patients Continuing Tamoxifen Treatment, United Kingdom, 1998–2016

A)

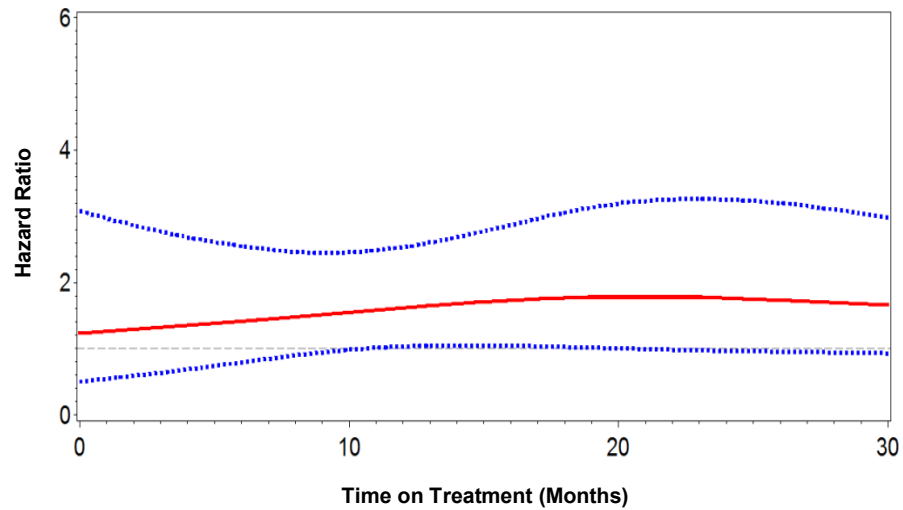

B)

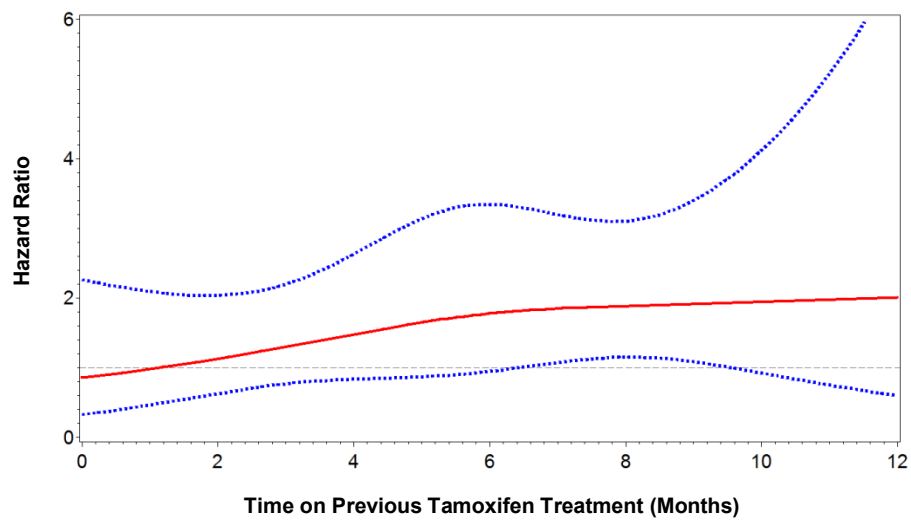

Supplement: kwaa065_azoulay_web_material_final.pdf [file kwaa065_azoulay_web_material_final.pdf]
